# Supplementary material for: Multistep loading of a DNA sliding clamp onto DNA by replication factor C
Source: eLife journal article supplement (doi:10.7554/elife.78253), 2022-07-22
Supplement: fig1-figsupp1-data1 [file elife-78253-fig1-figsupp1-data1-v1.pdf]

# Figure S1 - source data

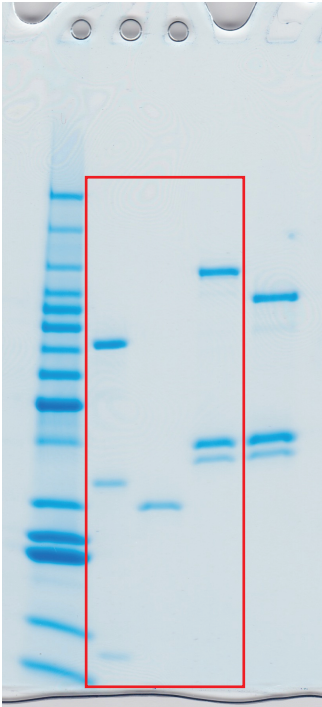

Figure S1A

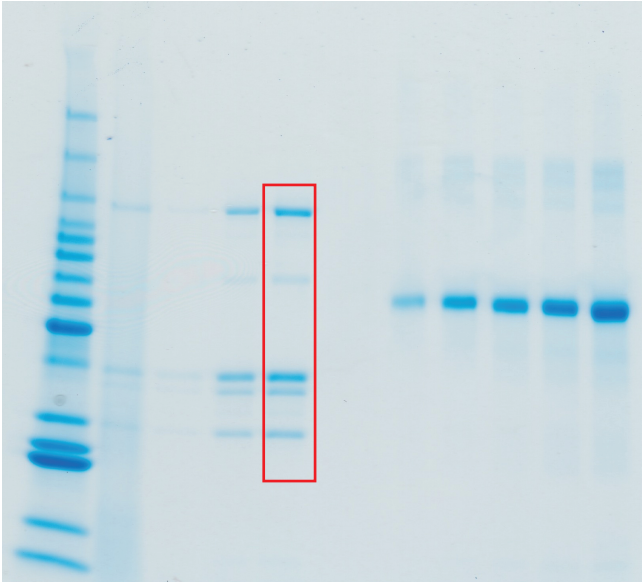

Figure S1E

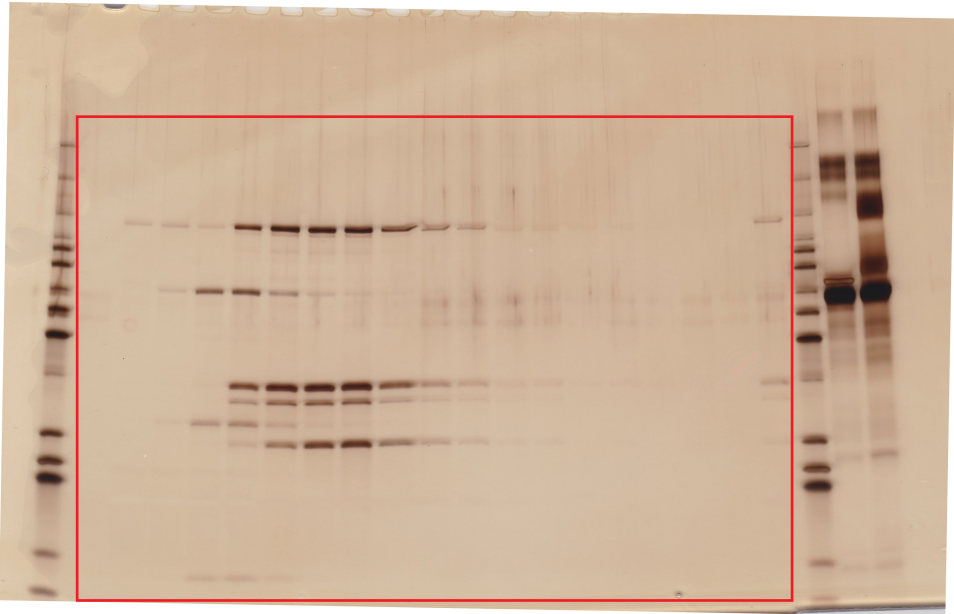

Figure S1D
