# Supplementary material for: Multistep loading of a DNA sliding clamp onto DNA by replication factor C
Source: eLife journal article supplement (doi:10.7554/elife.78253), 2022-07-22
Supplement: fig3-figsupp5-data1 [file elife-78253-fig3-figsupp5-data1-v1.pdf]

# Figure 5 - source data

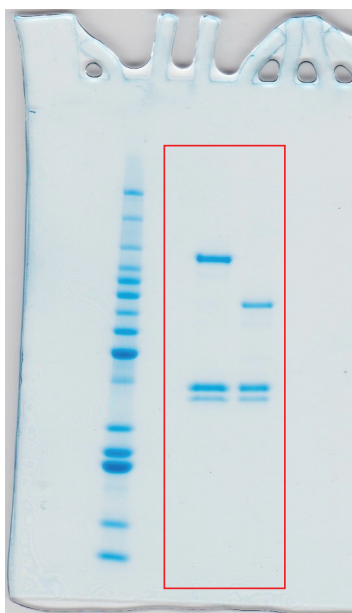

Figure 5A

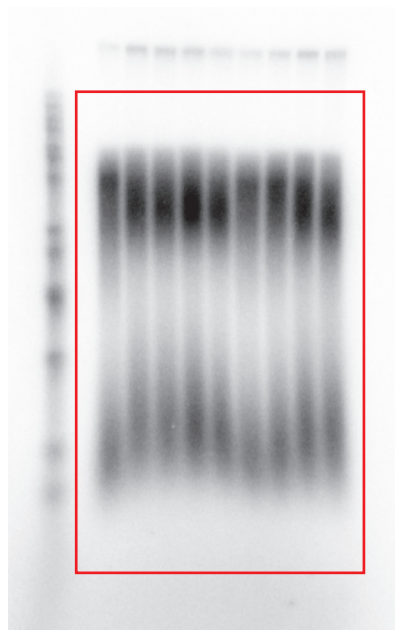

Figure 5C

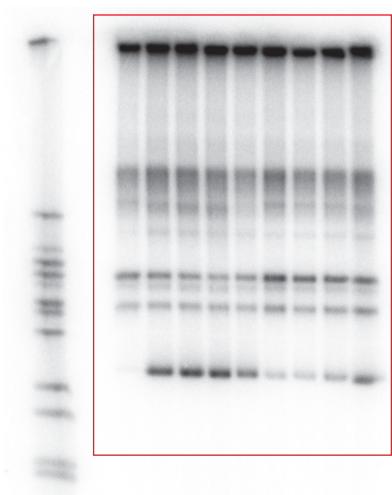

Figure 5E - native

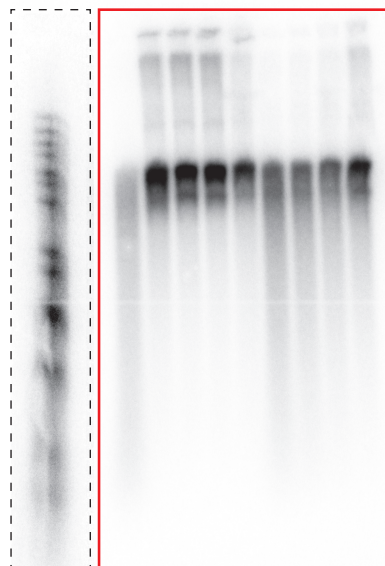

Figure 5E - denaturing  
(marker lane within dotted area is contrast-enhanced for better visualization)
